# Supplementary material for: Quantifying burden of intravitreal injections: questionnaire assessment of life impact of treatment by intravitreal injections (QUALITII)
Source: PubMed Central journal article supplement — BMJ Open Ophthalmol. 2022 Dec 19;7(1):e001188. doi: 10.1136/bmjophth-2022-001188 (PMC9764643; doi:10.1136/bmjophth-2022-001188), 2022-12-19
Supplement: bmjophth-2022-001188supp002.pdf [file bmjophth-2022-001188supp002.pdf]

**Appendix 2.** Method of calculation of IVI TBS

| Item                                                                                                   | Response Scale                                                                                                                                                                                                                                                              | Points                                                                                                   |
|--------------------------------------------------------------------------------------------------------|-----------------------------------------------------------------------------------------------------------------------------------------------------------------------------------------------------------------------------------------------------------------------------|----------------------------------------------------------------------------------------------------------|
| Q17 - How satisfied are you with the treatment of your eye disease?                                    | 0 (Very unsatisfied) – 6 (Very satisfied)                                                                                                                                                                                                                                   | [Subtract value entered from 6]                                                                          |
| Q21 - How bothered are you with the side effects or after effects you experienced with eye injections? | 0 (Not bothered at all) – 6 (Very bothered)                                                                                                                                                                                                                                 | [Value as entered]                                                                                       |
| Q23 - Please rate your pain or discomfort that result from your eye injections.                        | 0 (Insignificant) – 6 (Very significant)                                                                                                                                                                                                                                    | [Value as entered]                                                                                       |
| Q24 - How long after injection does your pain or discomfort last?                                      | a. I do not experience pain or discomfort<br>b. Less than 10 minutes<br>c. Between 10 minutes and 1 hour<br>d. Between 1 and 2 hours<br>e. Between 2 and 4 hours<br>f. Between 4 and 8 hours<br>g. Between 8 and 24 hours<br>h. Between 1 and 2 days<br>i. More than 2 days | Points entered<br>a. [0]<br>b. [1]<br>c. [2]<br>d. [3]<br>e. [4]<br>f. [5]<br>g. [6]<br>h. [7]<br>i. [8] |
| Q31 - How anxious are you before your treatments?                                                      | 0 (Very anxious) – 6 (Not at all anxious)                                                                                                                                                                                                                                   | [Subtract value entered from 6]                                                                          |
| Q32 - How anxious are you during your treatments?                                                      | 0 (Very anxious) – 6 (Not at all anxious)                                                                                                                                                                                                                                   | [Subtract value entered from 6]                                                                          |
| Q33 - How anxious are you after your treatments?                                                       | 0 (Very anxious) – 6 (Not at all anxious)                                                                                                                                                                                                                                   | [Subtract value entered from 6]                                                                          |
| Q41 - How time consuming is your eye treatment?                                                        | 0 (Not at all time-consuming) – 6 (Very time-consuming)                                                                                                                                                                                                                     | [Value as entered]                                                                                       |
| Q42 - How many hours do you typically spend in the clinic for each eye appointment?                    | a. Less than 1 hour<br>b. Between 1 and 3 hours<br>c. Between 3 and 4 hours<br>d. More than 4 hours                                                                                                                                                                         | Points entered<br>a. [1]<br>b. [2]<br>c. [3]<br>d. [4]                                                   |
| <b>IVI Treatment Burden Score Total</b>                                                                |                                                                                                                                                                                                                                                                             | Sum of all points                                                                                        |

**IVI-Treatment Burden Score** = (6 - Q17) + Q21 + Q23 + Q24 + (6 - Q31) + (6 - Q32) + (6 - Q33) + Q41 + Q42
